# Supplementary material for: Molecular-level understanding of the hTAS2R1 receptor-bitter tasting tetra-peptide binding: a structural biology study based on computational approaches
Source: Royal Society of Chemistry journal article supplement (doi:10.1039/d1nj04014f), 2021-01-01
Supplement: d1nj04014f1.pdf [file d1nj04014f1.pdf]

## Molecular-Level Understanding of the hTAS2R1 Receptor-Bitter Tasting Tetra- Peptides Binding: A Structural Biology Study Based on Computational Approaches

**Fangfang Wang<sup>a,\*</sup>, Wei Yang<sup>b,c,d1</sup>, Bo Zhou<sup>e</sup>**

<sup>a</sup> School of Life Science, Linyi University, Linyi, 276000, China.

<sup>b</sup> Warshel Institute for Computational Biology, School of Science and Engineering, The Chinese University of Hong Kong, Shenzhen, 518172, China;

<sup>c</sup> School of Biotechnology, University of Science and Technology of China, Hefei, 230026, China;

<sup>d</sup> Biomedicine Discovery Institute, Monash University, Melbourne, 3800. VIC. Australia;

<sup>e</sup> State Key Laboratory of Functions and Applications of Medicinal Plants, College of Basic Medical, Guizhou Medical University, Guizhou, 550004, China.

<sup>1</sup> These authors contributed equally to this work.

\* Corresponding author: E-mail: yu100288@163.com

**Table S1**

Summary of QSAR results for bitter-tasting tetra-peptides based on Alignment 1.

|                           | CoMFA   | CoMSIA  |             |         |              |              |         |         |         |
|---------------------------|---------|---------|-------------|---------|--------------|--------------|---------|---------|---------|
|                           | SE      | S       | E           | H       | D            | A            | SE      | SH      | SD      |
| $R^2_{cv}$                | 0.533   | 0.560   | 0.072       | 0.606   | 0.019        | -0.148       | 0.636   | 0.6     | 0.543   |
| $R^2_{ncv}$               | 0.995   | 0.984   | 0.582       | 0.998   | 0.528        | 0.379        | 0.988   | 0.998   | 0.998   |
| SEE                       | 0.074   | 0.128   | 0.600       | 0.041   | 0.614        | 0.705        | 0.117   | 0.047   | 0.047   |
| F                         | 335.267 | 133.344 | 6.033       | 1087.68 | 7.845        | 4.265        | 135.616 | 848.899 | 626.269 |
| $R^2_{pred}$              | 0.6601  | 0.828   | 0.1609      | 0.2987  | 0.2097       | 0.2312       | 0.9123  | 0.6476  | 0.8238  |
| SEP                       | 0.723   | 0.669   | 0.894       | 0.664   | 0.885        | 0.958        | 0.638   | 0.669   | 0.799   |
| $N_C$                     | 6       | 5       | 3           | 6       | 2            | 2            | 6       | 6       | 8       |
| <b>Field contribution</b> |         |         |             |         |              |              |         |         |         |
| S                         | 0.774   | 1.000   | -           | -       | -            | -            | 0.607   | 0.385   | 0.546   |
| E                         | 0.226   | -       | 1.000       | -       | -            | -            | 0.393   | -       | -       |
| H                         | -       | -       | -           | 1.000   | -            | -            | -       | 0.616   | -       |
| D                         | -       | -       | -           | -       | 1.000        | -            | -       | -       | 0.454   |
| A                         | -       | -       | -           | -       | -            | 1.000        | -       | -       | -       |
| <b>CoMSIA</b>             |         |         |             |         |              |              |         |         |         |
|                           | SA      | EH      | ED          | EA      | HD           | HA           | DA      | SEH     | SED     |
| $R^2_{cv}$                | 0.535   | 0.613   | 0.06        | -0.029  | 0.576        | 0.526        | -0.023  | 0.612   | 0.552   |
| $R^2_{ncv}$               | 0.989   | 0.995   | 0.995       | 0.429   | 0.999        | 0.999        | 0.538   | 0.989   | 0.997   |
| SEE                       | 0.110   | 0.076   | 0.099       | 0.676   | 0.039        | 0.032        | 0.608   | 0.105   | 0.063   |
| F                         | 153.128 | 323.337 | 114.44<br>2 | 5.258   | 1042.1<br>72 | 1516.1<br>57 | 8.150   | 199.207 | 350.651 |

|                           |         |              |             |         |              |             |        |          |          |
|---------------------------|---------|--------------|-------------|---------|--------------|-------------|--------|----------|----------|
| $R^2_{pred}$              | 0.7181  | 0.2699       | 0.119       | 0.3563  | 0.2278       | 0.1866      | 0.3291 | 0.7433   | 0.9272   |
| SEP                       | 0.721   | 0.658        | 1.324       | 0.907   | 0.726        | 0.768       | 0.904  | 0.628    | 0.792    |
| $N_C$                     | 6       | 6            | 10          | 2       | 7            | 7           | 2      | 5        | 8        |
| <b>Field contribution</b> |         |              |             |         |              |             |        |          |          |
| S                         | 0.721   | -            | -           | -       | -            | -           | -      | 0.289    | 0.416    |
| E                         | -       | 0.319        | 0.423       | 0.625   | -            | -           | -      | 0.248    | 0.252    |
| H                         | -       | 0.681        | -           | -       | 0.610        | 0.791       | -      | 0.463    | -        |
| D                         | -       | -            | 0.577       | -       | 0.390        | -           | 0.717  | -        | 0.332    |
| A                         | 0.279   | -            | -           | 0.375   | -            | 0.209       | 0.283  | -        | -        |
| <b>CoMSIA</b>             |         |              |             |         |              |             |        |          |          |
|                           | SEA     | SHD          | SHA         | SDA     | EHD          | EHA         | EDA    | HDA      | SEHD     |
| $R^2_{cv}$                | 0.581   | 0.603        | 0.571       | 0.447   | 0.567        | 0.570       | -0.063 | 0.507    | 0.597    |
| $R^2_{ncv}$               | 0.997   | 0.999        | 0.998       | 0.997   | 0.999        | 0.998       | 0.602  | 1.000    | 1.000    |
| SEE                       | 0.069   | 0.026        | 0.047       | 0.064   | 0.027        | 0.051       | 0.585  | 0.026    | 0.018    |
| F                         | 294.058 | 2323.59<br>2 | 852.47<br>1 | 339.851 | 1954.1<br>99 | 609.32<br>2 | 6.550  | 2114.333 | 4187.946 |
| $R^2_{pred}$              | 0.8219  | 0.5943       | 0.5388      | 0.7332  | 0.2720       | 0.1854      | 0.2203 | 0.2575   | 0.6269   |
| SEP                       | 0.765   | 0.703        | 0.693       | 0.879   | 0.779        | 0.731       | 0.956  | 0.830    | 0.751    |
| $N_C$                     | 8       | 7            | 6           | 8       | 8            | 7           | 3      | 8        | 8        |
| <b>Field contribution</b> |         |              |             |         |              |             |        |          |          |
| S                         | 0.533   | 0.260        | 0.331       | 0.466   | -            | -           | -      | -        | 0.221    |
| E                         | 0.295   | -            | -           | -       | 0.195        | 0.260       | 0.321  | -        | 0.163    |
| H                         | -       | 0.437        | 0.516       | -       | 0.504        | 0.605       | -      | 0.549    | 0.373    |
| D                         | -       | 0.303        | -           | 0.370   | 0.301        | -           | 0.489  | 0.329    | 0.243    |
| A                         | 0.172   | -            | 0.152       | 0.164   | -            | 0.135       | 0.189  | 0.122    | -        |
| <b>CoMSIA</b>             |         |              |             |         |              |             |        |          |          |
|                           | SEHA    | SEDA         | SHDA        | EHDA    | SEHDA        |             |        |          |          |
| $R^2_{cv}$                | 0.589   | 0.490        | 0.561       | 0.521   | 0.565        |             |        |          |          |
| $R^2_{ncv}$               | 0.999   | 0.998        | 0.999       | 0.999   | 0.998        |             |        |          |          |
| SEE                       | 0.041   | 0.051        | 0.041       | 0.038   | 0.055        |             |        |          |          |
| F                         | 935.882 | 540.439      | 972.431     | 953.833 | 531.757      |             |        |          |          |
| $R^2_{pred}$              | 0.5027  | 0.8989       | 0.6077      | 0.2673  | 0.6172       |             |        |          |          |
| SEP                       | 0.715   | 0.845        | 0.739       | 0.819   | 0.735        |             |        |          |          |
| $N_C$                     | 7       | 8            | 7           | 8       | 7            |             |        |          |          |
| <b>Field contribution</b> |         |              |             |         |              |             |        |          |          |
| S                         | 0.266   | 0.371        | 0.237       | -       | 0.209        |             |        |          |          |
| E                         | 0.200   | 0.214        | -           | 0.173   | 0.144        |             |        |          |          |
| H                         | 0.427   | -            | 0.401       | 0.472   | 0.355        |             |        |          |          |
| D                         | -       | 0.298        | 0.263       | 0.264   | 0.217        |             |        |          |          |
| A                         | 0.107   | 0.117        | 0.099       | 0.092   | 0.076        |             |        |          |          |

**Table S2**

Summary of QSAR results for bitter-tasting tetra-peptides based on Alignment 2.

|                           | CoMF        | CoMSIA       |             |               |             |               |               |              |               |
|---------------------------|-------------|--------------|-------------|---------------|-------------|---------------|---------------|--------------|---------------|
|                           | A           | SE           | S           | E             | H           | D             | A             | SE           | SH            |
| $R^2_{cv}$                | -0.062      | 0.157        | 0.049       | -0.039        | 0.158       | -0.169        | 0.080         | 0.027        | 0.105         |
| $R^2_{ncv}$               | 0.602       | 0.995        | 1.000       | 0.648         | 0.992       | 0.997         | 1.000         | 0.727        | 0.999         |
| SEE                       | 0.545       | 0.074        | 0.020       | 0.512         | 0.084       | 0.056         | 0.013         | 0.451        | 0.034         |
| F                         | 22.662      | 342.02<br>1  | 4656.5<br>3 | 27.603        | 390.71<br>7 | 585.29<br>1   | 10747.<br>363 | 39.909       | 1912.074      |
| $R^2_{pred}$              | 0.0634      | 0.0061       | 0.1862      | 0.2541        | 0.1869      | 0.2794        | 0.0033        | 0.2372       | 0.0156        |
| SEP                       | 0.891       | 0.971        | 1.031       | 0.880         | 0.886       | 0.955         | 1.014         | 0.852        | 0.954         |
| $N_C$                     | 1           | 6            | 6           | 1             | 4           | 6             | 6             | 1            | 5             |
| <b>Field contribution</b> |             |              |             |               |             |               |               |              |               |
| S                         | 0.333       | 1.000        | -           | -             | -           | -             | 0.364         | 0.374        | 0.338         |
| E                         | 0.667       | -            | 1.000       | -             | -           | -             | 0.636         | -            | -             |
| H                         | -           | -            | -           | 1.000         | -           | -             | -             | 0.626        | -             |
| D                         | -           | -            | -           | -             | 1.000       | -             | -             | -            | 0.662         |
| A                         | -           | -            | -           | -             | -           | 1.000         | -             | -            | -             |
| <b>CoMSIA</b>             |             |              |             |               |             |               |               |              |               |
|                           | SA          | EH           | ED          | EA            | HD          | HA            | DA            | SEH          | SED           |
| $R^2_{cv}$                | -0.102      | 0.081        | 0.047       | -0.110        | -0.024      | -0.001        | -0.068        | 0.043        | 0.072         |
| $R^2_{ncv}$               | 0.670       | 0.998        | 0.996       | 1.000         | 0.767       | 0.998         | 1.000         | 0.998        | 1.000         |
| SEE                       | 0.496       | 0.039        | 0.064       | 0.020         | 0.417       | 0.037         | 0.008         | 0.042        | 0.007         |
| F                         | 30.445      | 1819.3<br>93 | 676.97<br>3 | 5501.9<br>79  | 49.308      | 1986.7<br>59  | 26521.<br>825 | 1553.9<br>76 | 41932.<br>475 |
| $R^2_{pred}$              | 0.0181      | 0.0728       | 0.0025      | 0.0117        | 0.3270      | 0.1070        | 0.0584        | 0.0252       | 0.0034        |
| SEP                       | 0.907       | 0.926        | 0.943       | 0.917         | 0.874       | 0.875         | 0.929         | 0.944        | 1.019         |
| $N_C$                     | 1           | 4            | 4           | 5             | 1           | 4             | 6             | 4            | 6             |
| <b>Field contribution</b> |             |              |             |               |             |               |               |              |               |
| S                         | 0.429       | -            | -           | -             | -           | -             | -             | 0.207        | 0.237         |
| E                         | -           | 0.496        | 0.501       | 0.548         | -           | -             | -             | 0.402        | 0.362         |
| H                         | -           | 0.504        | -           | -             | 0.528       | 0.552         | -             | 0.390        | -             |
| D                         | -           | -            | 0.499       | -             | 0.472       | -             | 0.553         | -            | 0.401         |
| A                         | 0.571       | -            | -           | 0.452         | -           | 0.448         | 0.447         | -            | -             |
| <b>CoMSIA</b>             |             |              |             |               |             |               |               |              |               |
|                           | SEA         | SHD          | SHA         | SDA           | EHD         | EHA           | EDA           | HDA          | SEHD          |
| $R^2_{cv}$                | 0.010       | 0.004        | -0.001      | -0.025        | 0.060       | 0.093         | -0.064        | 0.028        | 0.045         |
| $R^2_{ncv}$               | 1.000       | 0.780        | 0.752       | 1.000         | 1.000       | 1.000         | 1.000         | 0.999        | 0.999         |
| SEE                       | 0.004       | 0.405        | 0.430       | 0.010         | 0.005       | 0.006         | 0.022         | 0.024        | 0.023         |
| F                         | 118.12<br>9 | 53.160       | 45.505      | 17544.<br>863 | 643.86      | 58658.<br>241 | 4628.3<br>37  | 4842.3<br>46 | 5065.479      |
| $R^2_{pred}$              | 0.0105      | 0.2567       | 0.1342      | 0.0478        | 0.0123      | 0.0729        | 0.0029        | 0.0383       | 0.0003        |
| SEP                       | 1.053       | 0.862        | 0.864       | 0.903         | 1.025       | 1.0087        | 0.911         | 0.952        | 0.944         |
| $N_C$                     | 6           | 1            | 1           | 6             | 6           | 5             | 5             | 4            | 4             |

| <b>Field contribution</b> |           |           |           |            |          |       |       |       |       |
|---------------------------|-----------|-----------|-----------|------------|----------|-------|-------|-------|-------|
| S                         | 0.241     | 0.240     | 0.250     | 0.236      | -        | -     | -     | -     | 0.154 |
| E                         | 0.422     | -         | -         | -          | 0.329    | 0.342 | 0.359 | -     | 0.285 |
| H                         | -         | 0.401     | 0.418     | -          | 0.352    | 0.371 | -     | 0.372 | 0.291 |
| D                         | -         | 0.359     | -         | 0.425      | 0.319    | -     | 0.343 | 0.339 | 0.270 |
| A                         | 0.337     | -         | 0.332     | 0.338      | -        | 0.287 | 0.298 | 0.289 | -     |
| <b>CoMSIA</b>             |           |           |           |            |          |       |       |       |       |
|                           | SEHA      | SEDA      | SHDA      | EHDA       | SEHDA    |       |       |       |       |
| $R^2_{cv}$                | 0.069     | 0.006     | 0.009     | 0.056      | 0.049    |       |       |       |       |
| $R^2_{ncv}$               | 1.000     | 1.000     | 1.000     | 1.000      | 1.000    |       |       |       |       |
| SEE                       | 0.011     | 0.014     | 0.007     | 0.003      | 0.009    |       |       |       |       |
| F                         | 19009.173 | 10841.015 | 41718.111 | 168101.932 | 28246.17 |       |       |       |       |
| $R^2_{pred}$              | 0.0495    | 0.0029    | 0.0618    | 0.0211     | 0.0164   |       |       |       |       |
| SEP                       | 0.973     | 1.006     | 1.053     | 1.027      | 1.031    |       |       |       |       |
| $N_C$                     | 5         | 5         | 6         | 6          | 5        |       |       |       |       |
| <b>Field contribution</b> |           |           |           |            |          |       |       |       |       |
| S                         | 0.154     | 0.177     | 0.155     | -          | 0.124    |       |       |       |       |
| E                         | 0.298     | 0.300     | -         | 0.257      | 0.231    |       |       |       |       |
| H                         | 0.304     | -         | 0.309     | 0.287      | 0.243    |       |       |       |       |
| D                         | -         | 0.281     | 0.289     | 0.239      | 0.212    |       |       |       |       |
| A                         | 0.245     | 0.242     | 0.247     | 0.216      | 0.190    |       |       |       |       |

**Table S3**

Summary of QSAR results for bitter-tasting tetra-peptides based on Alignment 3.

|                           | CoMFA  | CoMSIA |        |        |        |        |        |        |        |
|---------------------------|--------|--------|--------|--------|--------|--------|--------|--------|--------|
|                           | SE     | S      | E      | H      | D      | A      | SE     | SH     | SD     |
| $R^2_{cv}$                | -0.054 | 0.041  | -1.159 | -0.379 | -0.141 | -0.954 | -0.561 | -0.123 | 0.010  |
| $R^2_{ncv}$               | 0.525  | 0.676  | 0.454  | 0.787  | 0.705  | 0.508  | 0.683  | 0.780  | 0.784  |
| SEE                       | 0.595  | 0.492  | 0.638  | 0.399  | 0.469  | 0.606  | 0.486  | 0.405  | 0.402  |
| F                         | 16.602 | 31.242 | 12.464 | 55.371 | 35.851 | 15.492 | 32.344 | 53.245 | 54.367 |
| $R^2_{pred}$              | 0.5603 | 0.4504 | 0.0256 | 0.0532 | 0.4053 | 0.2518 | 0.2067 | 0.2953 | 0.7550 |
| SEP                       | 0.887  | 0.846  | 1.269  | 1.014  | 0.923  | 1.207  | 1.079  | 0.915  | 0.859  |
| $N_C$                     | 1      | 1      | 1      | 1      | 1      | 1      | 1      | 1      | 1      |
| <b>Field contribution</b> |        |        |        |        |        |        |        |        |        |
| S                         | 0.555  | 1.000  | -      | -      | -      | -      | 0.489  | 0.413  | 0.327  |
| E                         | 0.445  | -      | 1.000  | -      | -      | -      | 0.511  | -      | -      |
| H                         | -      | -      | -      | 1.000  | -      | -      | -      | 0.587  | -      |
| D                         | -      | -      | -      | -      | 1.000  | -      | -      | -      | 0.673  |
| A                         | -      | -      | -      | -      | -      | 1.000  | -      | -      | -      |
| <b>CoMSIA</b>             |        |        |        |        |        |        |        |        |        |
|                           | SA     | EH     | ED     | EA     | HD     | HA     | DA     | SEH    | SED    |
| $R^2_{cv}$                | -0.300 | -0.840 | -0.540 | -1.231 | -0.188 | -0.743 | -0.508 | -0.494 | -0.270 |
| $R^2_{ncv}$               | 0.892  | 0.718  | 0.705  | 0.572  | 0.796  | 0.713  | 0.700  | 0.761  | 0.953  |

|                                |         |        |         |        |        |        |        |        |         |
|--------------------------------|---------|--------|---------|--------|--------|--------|--------|--------|---------|
| SEE                            | 0.294   | 0.458  | 0.469   | 0.565  | 0.391  | 0.462  | 0.473  | 0.422  | 0.194   |
| F                              | 57.516  | 38.238 | 35.766  | 20.031 | 58.352 | 37.344 | 35.056 | 47.750 | 140.904 |
| R <sup>2</sup> <sub>pred</sub> | 0.1407  | 0.0218 | 0.2346  | 0.1313 | 0.2629 | 0.0326 | 0.1477 | 0.1678 | 0.4842  |
| SEP                            | 1.050   | 1.172  | 1.072   | 1.290  | 0.942  | 1.140  | 1.061  | 1.056  | 0.993   |
| N <sub>C</sub>                 | 2       | 1      | 1       | 1      | 1      | 1      | 1      | 1      | 2       |
| <b>Field contribution</b>      |         |        |         |        |        |        |        |        |         |
| S                              | 0.403   | -      | -       | -      | -      | -      | -      | 0.288  | 0.268   |
| E                              | -       | 0.424  | 0.337   | 0.431  | -      | -      | -      | 0.302  | 0.229   |
| H                              | -       | 0.576  | -       | -      | 0.409  | 0.507  | -      | 0.410  | -       |
| D                              | -       | -      | 0.663   | -      | 0.591  | -      | 0.598  | -      | 0.503   |
| A                              | 0.597   | -      | -       | 0.569  | -      | 0.493  | 0.402  | -      | -       |
| <b>CoMSIA</b>                  |         |        |         |        |        |        |        |        |         |
|                                | SEA     | SHD    | SHA     | SDA    | EHD    | EHA    | EDA    | HDA    | SEHD    |
| R <sup>2</sup> <sub>cv</sub>   | -0.707  | -0.075 | -0.393  | -0.307 | -0.479 | -0.970 | -0.734 | -0.458 | -0.294  |
| R <sup>2</sup> <sub>ncv</sub>  | 0.976   | 0.817  | 0.935   | 0.767  | 0.774  | 0.702  | 0.701  | 0.766  | 0.958   |
| SEE                            | 0.144   | 0.370  | 0.227   | 0.417  | 0.411  | 0.472  | 0.472  | 0.418  | 0.183   |
| F                              | 176.546 | 66.833 | 101.151 | 49.394 | 51.324 | 35.327 | 35.171 | 49.015 | 160.392 |
| R <sup>2</sup> <sub>pred</sub> | 0.0044  | 0.4665 | 0.0276  | 0.3944 | 0.1799 | 0.0180 | 0.0616 | 0.0979 | 0.3864  |
| SEP                            | 1.153   | 0.895  | 1.037   | 0.987  | 1.050  | 1.212  | 1.137  | 1.043  | 0.993   |
| N <sub>C</sub>                 | 3       | 1      | 2       | 1      | 1      | 1      | 1      | 1      | 2       |
| <b>Field contribution</b>      |         |        |         |        |        |        |        |        |         |
| S                              | 0.319   | 0.223  | 0.273   | 0.225  | -      | -      | -      | -      | 0.192   |
| E                              | 0.299   | -      | -       | -      | 0.231  | 0.272  | 0.233  | -      | 0.168   |
| H                              | -       | 0.317  | 0.382   | -      | 0.314  | 0.369  | -      | 0.292  | 0.269   |
| D                              | -       | 0.459  | -       | 0.463  | 0.455  | -      | 0.459  | 0.423  | 0.371   |
| A                              | 0.382   | -      | 0.345   | 0.311  | -      | 0.359  | 0.308  | 0.284  | -       |
| <b>CoMSIA</b>                  |         |        |         |        |        |        |        |        |         |
|                                | SEHA    | SEDA   | SHDA    | EHDA   | SEHDA  |        |        |        |         |
| R <sup>2</sup> <sub>cv</sub>   | -0.673  | -0.523 | -0.309  | -0.647 | -0.487 |        |        |        |         |
| R <sup>2</sup> <sub>ncv</sub>  | 0.752   | 0.756  | 0.796   | 0.754  | 0.784  |        |        |        |         |
| SEE                            | 0.430   | 0.426  | 0.390   | 0.428  | 0.402  |        |        |        |         |
| F                              | 45.480  | 46.553 | 58.600  | 46.093 | 54.407 |        |        |        |         |
| R <sup>2</sup> <sub>pred</sub> | 0.0157  | 0.2336 | 0.2458  | 0.0633 | 0.1746 |        |        |        |         |
| SEP                            | 1.117   | 1.066  | 0.988   | 1.108  | 1.053  |        |        |        |         |
| N <sub>C</sub>                 | 1       | 1      | 1       | 1      | 1      |        |        |        |         |
| <b>Field contribution</b>      |         |        |         |        |        |        |        |        |         |
| S                              | 0.206   | 0.182  | 0.170   | -      | 0.145  |        |        |        |         |
| E                              | 0.216   | 0.191  | -       | 0.177  | 0.151  |        |        |        |         |
| H                              | 0.293   | -      | 0.243   | 0.241  | 0.206  |        |        |        |         |
| D                              | -       | 0.375  | 0.351   | 0.348  | 0.298  |        |        |        |         |
| A                              | 0.285   | 0.252  | 0.236   | 0.234  | 0.200  |        |        |        |         |

**Table S4** Actual and predicted activity values derived from the developed 3D-QSAR models.

| Compound | Actual values<br>(Log 1/T) | Predicted values ((Log 1/T) |        |
|----------|----------------------------|-----------------------------|--------|
|          |                            | CoMFA                       | CoMSIA |
| 1        | 1.60                       | 1.576                       | 1.646  |
| 2        | 1.70                       | 1.623                       | 1.571  |
| 3        | 1.90                       | 2.014                       | 2.11   |
| 4        | 2.34                       | 2.27                        | 2.274  |
| 5        | 2.34                       | 3.126                       | 2.886  |
| 6        | 2.52                       | 3.122                       | 3.102  |
| 7        | 2.52                       | 2.541                       | 2.551  |
| 8        | 2.52                       | 2.605                       | 2.401  |
| 9        | 2.70                       | 2.687                       | 2.716  |
| 10       | 2.76                       | 2.724                       | 3.034  |
| 11       | 2.85                       | 2.93                        | 2.945  |
| 12       | 2.90                       | 2.867                       | 2.904  |
| 13       | 3.23                       | 3.241                       | 3.249  |
| 14       | 3.41                       | 3.635                       | 3.371  |
| 15       | 3.52                       | 3.422                       | 3.401  |
| 16       | 3.52                       | 3.539                       | 3.563  |
| 17       | 3.52                       | 3.478                       | 3.441  |
| 18       | 3.80                       | 3.571                       | 3.78   |
| 19       | 3.80                       | 3.762                       | 3.307  |
| 20       | 3.80                       | 3.805                       | 3.866  |
| 21       | 3.92                       | 3.952                       | 3.963  |
| 22       | 4.00                       | 4.031                       | 3.985  |
| 23       | 4.40                       | 4.358                       | 4.356  |

**Table S5** The binding free energy between the **Pep23/Pep01** and hTAS2R1 based on the MD simulation (150 frame, respectively) from the lowest kinetics free energy landscape

| Energy        | Energy Terms  | Pep01     |                 | Pep23    |                 |
|---------------|---------------|-----------|-----------------|----------|-----------------|
|               |               | average   | Std.Err.of Mean | average  | Std.Err.of Mean |
| GBSA          | VDWAALS       | -34.2811  | 0.5186          | -47.6254 | 1.1818          |
|               | EEL           | -172.0266 | 6.4774          | 26.7793  | 6.489           |
|               | EGB           | 188.4109  | 5.646           | -6.8392  | 5.833           |
|               | ESURF         | -5.6819   | 0.0701          | -7.5186  | 0.1236          |
|               | DELTA G gas   | -206.3077 | 6.5755          | -20.8461 | 6.0348          |
|               | DELTA G solv  | 182.729   | 5.5909          | -14.3578 | 5.8553          |
|               | TS            | -28.6457  | 2.5645          | -29.6274 | 2.312           |
|               | DELTA GBSA    | -23.5786  | 1.2338          | -35.2038 | 1.3701          |
|               | DELTA G total | 5.0671    | 3.7983          | -5.5764  | 3.6821          |
|               | PBSA          | VDWAALS   | -34.2811        | 0.5186   | -47.6254        |
| EEL           |               | -172.0266 | 6.4774          | 26.7793  | 6.489           |
| EPB           |               | 186.8132  | 5.7815          | -7.2668  | 5.4491          |
| ENPOLAR       |               | -4.0201   | 0.0259          | -5.912   | 0.0557          |
| DELTA G gas   |               | -206.3077 | 6.5755          | -20.8461 | 6.0348          |
| DELTA G solv  |               | 182.793   | 5.7696          | -13.1788 | 5.4502          |
| TS            |               | -28.6457  | 2.5645          | -29.6274 | 2.312           |
| DELTA PBSA    |               | -23.5146  | 1.5879          | -34.0249 | 1.6613          |
| DELTA G total |               | 5.1311    | 4.1524          | -4.3975  | 3.9733          |

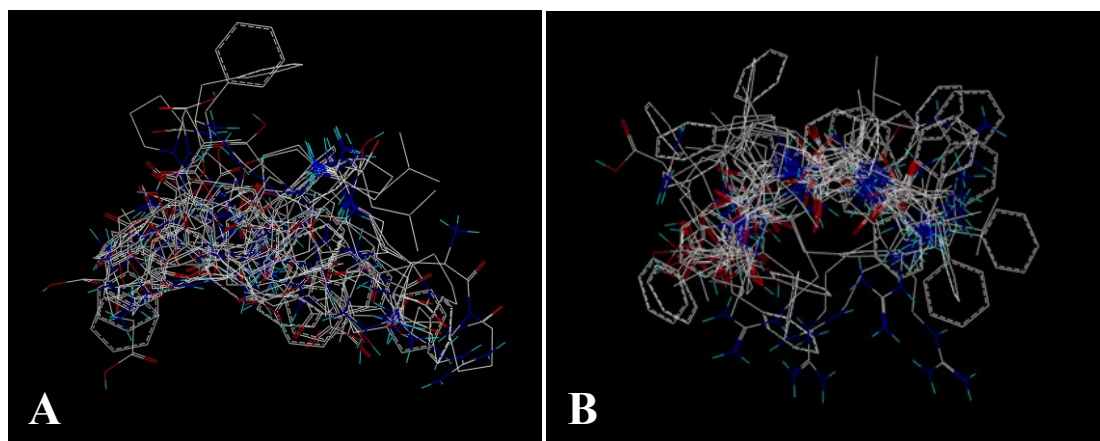

**Figure S1.** (A) Present the alignments for bitter peptides from Alignment 2. (B) Present the alignments for bitter peptides from Alignment 3.

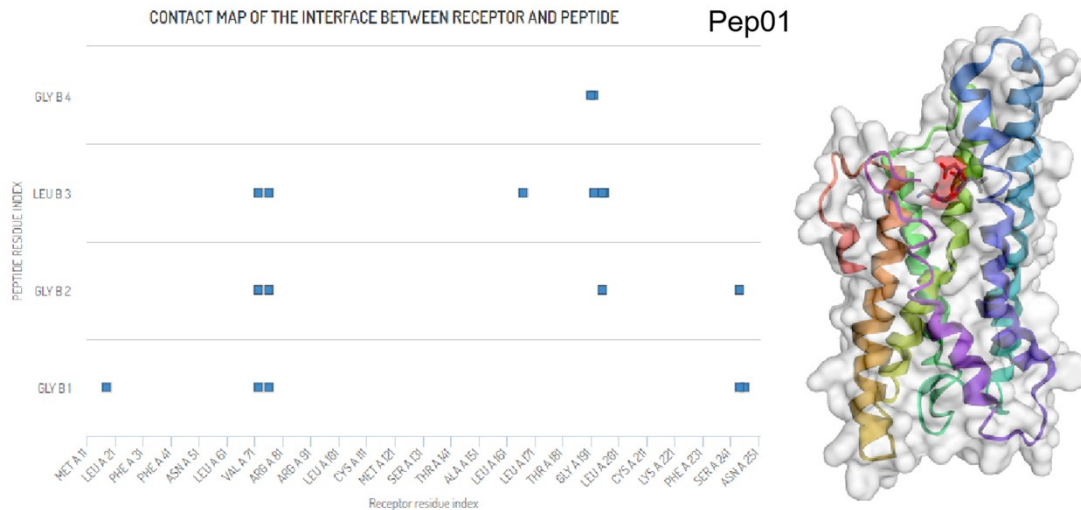

**Figure S2.** The binding interactions between **Pep01** and hTAS2R1. (A) The contact map of the interface between receptor hTAS2R1 and the **Pep01**. (B) The 3D complex structure of hTAS2R1-**Pep01**. The **Pep01** was shown as red stick and red transparent sphere.

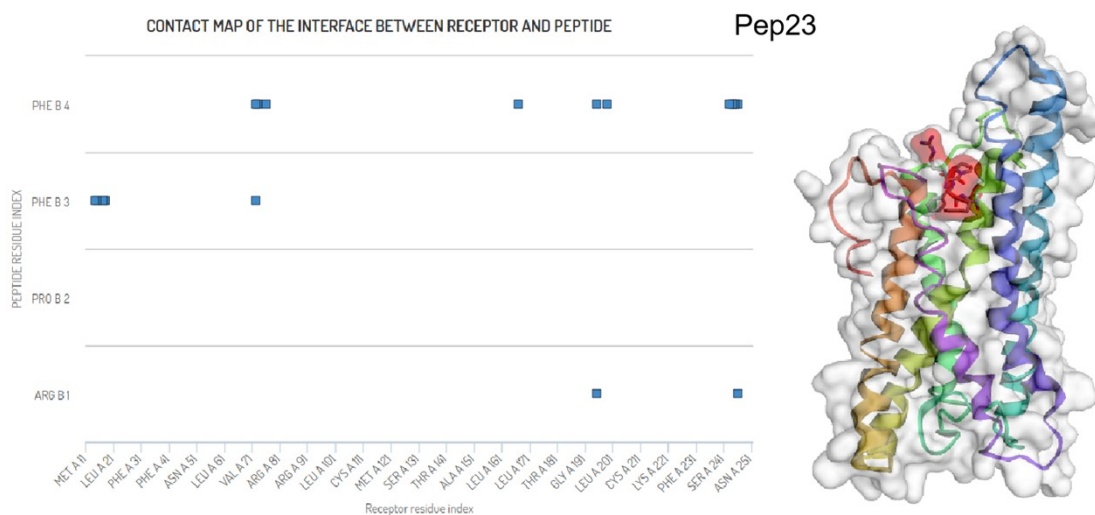

**Figure S3.** The binding interactions between **Pep23** and hTAS2R1. (A) The contact map of the interface between receptor hTAS2R1 and the **Pep23**. (B) The 3D complex structure of hTAS2R1-**Pep23**. The **Pep23** was shown as red stick and red transparent sphere.



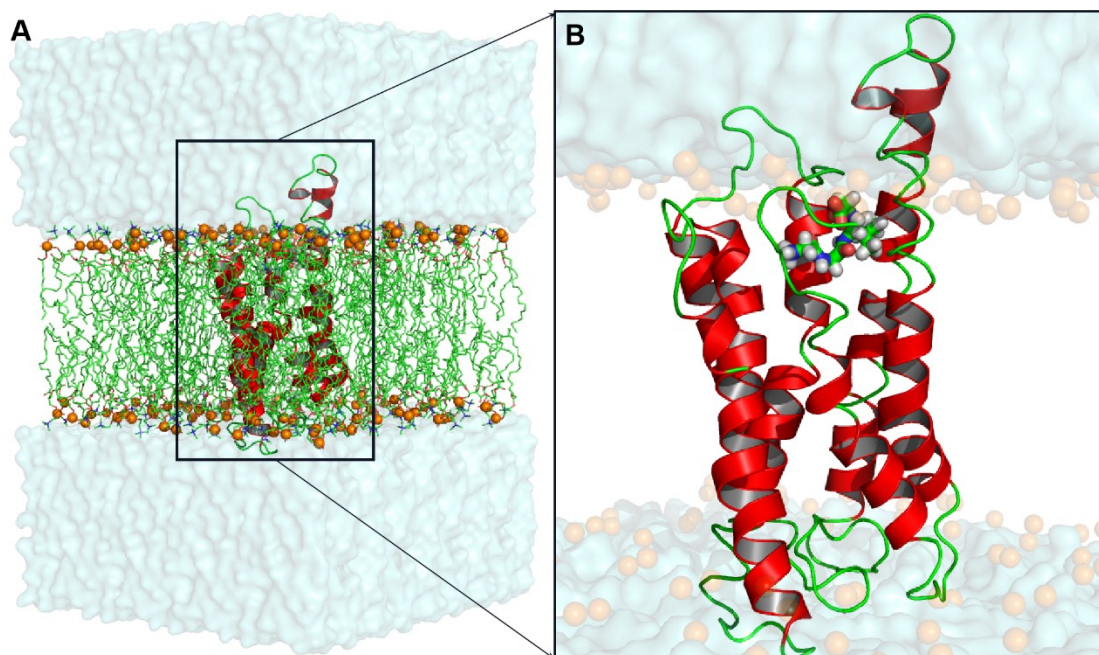

**Figure S4.** 3D structure for the MD input. (A) The overall structure of the hTAS2R1-peptide-membrane system. (B) The zoom-in structure of the hTAS2R1-peptide, where lipids were hidden.

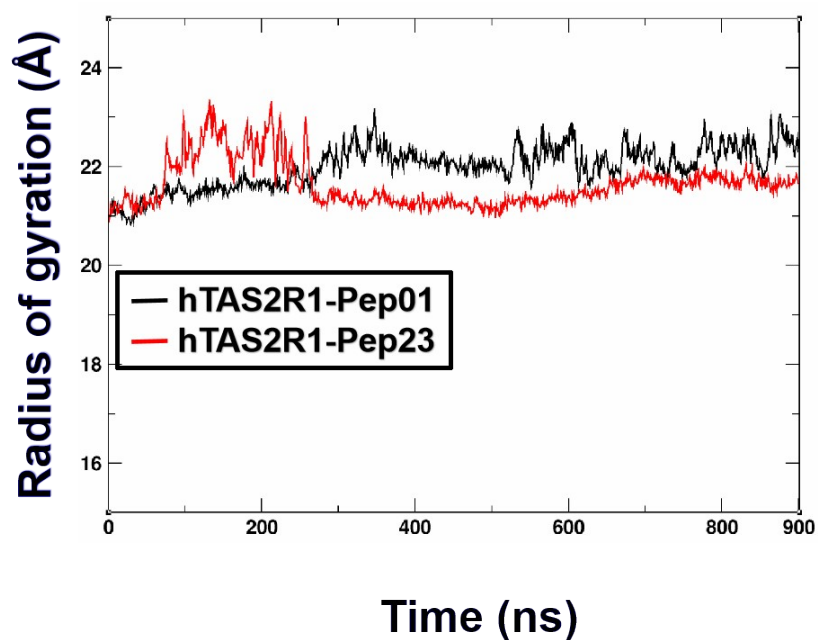

**Figure S5.** The R<sub>g</sub> plot for heavy atoms in the hTAS2R1 protein along the MD trajectories.
